# Supplementary material for: Analyses of Genes Critical to Tumor Survival Reveal Potential ‘Supertargets’: Focus on Transcription
Source: MDPI journal article supplement (doi:10.3390/cancers15113042), 2023-06-03
Supplement: s1 [file s1]

### Top-5 Supertargets for 27 cancer types presented in DepMap

Med-all, median expression of the Supertargets in all tumor cell lines.

Med-CS (cancer specific), median expression of the Supertargets in tumor cells in which it was identified.

#### Blood malignancies

##### Acute lymphocytic leukemia

| Gene            | T-statistics | P-value  | Function                                | Domain                      | Expression                         | PubMed entries |
|-----------------|--------------|----------|-----------------------------------------|-----------------------------|------------------------------------|----------------|
| <i>ATP6V0A2</i> | -14.5        | 1.12E-43 | Part of the proton channel of V-ATPases | V-type ATPase               | Med all 3.52<br>Med CS 4.3         | 70             |
| <i>MYB</i>      | -13.3        | 1.84E-37 | Transcription factor                    | HTH DNA-binding domain      | Med all 2.08<br>Med CS <b>7.4</b>  | 7 570          |
| <i>LEF1</i>     | -13.3        | 2.71E-37 | Transcription factor                    | HMG box DNA-binding domain  | Med all 2.37<br>Med CS <b>8.83</b> | 1 520          |
| <i>RUNX1</i>    | -13.2        | 5.29E-37 | Transcription factor                    | HTH-type DNA-binding domain | Med all 3.57<br>Med CS 5.88        | 4 378          |
| <i>EBF1</i>     | -12.2        | 3.6E-32  | Transcription factor                    | HLH DNA-binding domain      | Med all 0.9<br>Med CS <b>5.88</b>  | 547            |

##### Acute myelogenous leukemia

| Gene       | T-statistics | P-value  | Function             | Domain                 | Expression                         | PubMed entries |
|------------|--------------|----------|----------------------|------------------------|------------------------------------|----------------|
| <i>MYB</i> | -20.1        | 6.73E-76 | Transcription factor | HTH DNA binding domain | Med all 2.08<br>Med CS <b>7.11</b> | 7 570          |

|              |       |          |                                                |                                  |                                    |        |
|--------------|-------|----------|------------------------------------------------|----------------------------------|------------------------------------|--------|
| <i>SPI1</i>  | -18.1 | 6.9E-64  | Transcription factor                           | HTH-type DNA binding domain      | Med all 0.68<br>Med CS <b>6.89</b> | 608    |
| <i>LMO2</i>  | -17.2 | 1.44E-58 | Member of multiprotein DNA binding complex     | 2 LIM domain                     | Med all 1.33<br>Med CS <b>6.49</b> | 606    |
| <i>JAK2</i>  | -14.6 | 3.04E-44 | Non-membrane spanning tyrosine kinase activity | B41, SH2, tyrosine kinase domain | Med all 1.73<br>Med CS 2.39        | 11 972 |
| <i>GFII1</i> | -13.9 | 4.04E-40 | Transcription factor                           | 6 zinc fingers of C2H2-type      | Med all 1.19<br>Med CS <b>5.41</b> | 460    |

### Chronic myelogenous leukemia

| Gene          | T-statistics | P-value   | Function                                                                 | Domain                                                   | Expression                         | PubMed entries |
|---------------|--------------|-----------|--------------------------------------------------------------------------|----------------------------------------------------------|------------------------------------|----------------|
| <i>BCR</i>    | -30          | 1.48E-142 | Serine/threonine kinase activity; the part of the BCR-ABL fusion protein | RhoGEF, PH, C2, RhoGAP                                   | Med all 3.95<br>Med CS 4.7         | 24 546         |
| <i>ABL1</i>   | -23.5        | 2.89E-98  | Tyrosine kinase, the part of the BCR-ABL fusion protein                  | SH3, SH2, TyrKc, FABD                                    | Med all 4.62<br>Med CS 5.18        | 3 034          |
| <i>GAB2</i>   | -16.5        | 3.16E-54  | Adapter protein                                                          | PH                                                       | Med all 2.53<br>Med CS <b>5.11</b> | 484            |
| <i>SOS1</i>   | -16.3        | 3.92E-53  | Guanine nucleotide exchange factor for Ras proteins                      | RhoGEF, PH, RasGEFN, RasGEF                              | Med all 3.34<br>Med CS 3.66        | 1 009          |
| <i>STAT5B</i> | -15.8        | 1.08E-50  | Signal transduction and activation of transcription                      | DNA binding domain with an immunoglobulin-like fold, SH2 | Med all 4.13<br>Med CS 5.96        | 1 223          |

### Hodgkin's lymphoma

| Gene           | T-statistics | P-value  | Function                                        | Domain                                                  | Expression                  | Pub Med entries |
|----------------|--------------|----------|-------------------------------------------------|---------------------------------------------------------|-----------------------------|-----------------|
| <i>IL13RA1</i> | -21.6        | 1.36E-85 | Cytokine-mediated signaling                     | IgG-like, cytokine-binding domain, fibronectin type III | Med all 4.18<br>Med CS 4.9  | 357             |
| <i>STAT6</i>   | -15.5        | 1.25E-48 | Signal transduction, transcriptional activation | STAT DNA binding, SH2                                   | Med all 5.3<br>Med CS 6.87  | 3<br>531        |
| <i>IL4R</i>    | -9.63        | 4.42E-21 | Receptor for interleukins 4 and 13              | Fibronectin type-III                                    | Med all 3.76<br>Med CS 6.11 | 436             |
| <i>IKZF1</i>   | -8.26        | 4.53E-16 | Transcription factor                            | 6 tandemly placed C2H2-type zinc fingers                | Med all 0.98<br>Med CS 6.59 | 921             |
| <i>BATF3</i>   | -6.14        | 1.15E-09 | Transcription factor                            | bZIP                                                    | Med all 1.65<br>Med CS 8.2  | 270             |

### Non-Hodgkin lymphoma

| Gene         | T-statistics | P-value  | Function             | Domain                                  | Expression                  | PubMed entries |
|--------------|--------------|----------|----------------------|-----------------------------------------|-----------------------------|----------------|
| <i>MEF2B</i> | -21.4        | 2.2E-84  | Transcription factor | MADS DNA binding domain                 | No data                     | 121            |
| <i>EBF1</i>  | -19.4        | 8.16E-72 | Transcription factor | IPT and HLH DNA binding domain          | Med all 0.9<br>Med CS 1.92  | 554            |
| <i>BCL6</i>  | -17.6        | 6.77E-61 | Transcription factor | BTB/POZ domain, 6 tandemly placed C2H2- | Med all 3.18<br>Med CS 2.93 | 3 694          |

|               |       |          |                                       |                        |                             |       |
|---------------|-------|----------|---------------------------------------|------------------------|-----------------------------|-------|
|               |       |          |                                       | type Zinc fingers      |                             |       |
| <i>SH3GL1</i> | -16.5 | 2.4E-54  | Endocytosis; a role in the cell cycle | BAR, SH3               | Med all 5.3<br>Med CS 4.38  | 42    |
| <i>PAX5</i>   | -16.5 | 3.12E-54 | Transcription factor                  | PAX DNA binding domain | Med all 0.68<br>Med CS 3.65 | 1 952 |

#### Plasma cell/multiple myeloma

| <b>Gene</b>    | <b>T-statistics</b> | <b>P-value</b> | <b>Function</b>                              | <b>Domain</b>                                            | <b>Expression</b> | <b>PubMed entries</b> |
|----------------|---------------------|----------------|----------------------------------------------|----------------------------------------------------------|-------------------|-----------------------|
| <i>IRF4</i>    | -24.8               | 1.56E-106      | Transcription factor                         | IRF (tryptophan pentad repeat) DNA binding domain, IRF-3 | No data           | 1 487                 |
| <i>PRDM1</i>   | -22.7               | 5.93E-93       | Transcription factor                         | SET, 5 tandemly placed C2H2-type zinc fingers            | No data           | 1 021                 |
| <i>POU2AF1</i> | -19.3               | 3.51E-71       | Transcription factor                         | POU DNA binding domain                                   | No data           | 204                   |
| <i>HERPUD1</i> | -18.7               | 1.04E-67       | Endoplasmic reticulum quality control system | Ubiquitin-like                                           | No data           | 130                   |
| <i>MEF2C</i>   | -18.3               | 3.39E-65       | Transcription factor                         | MADS DNA binding domain                                  | No data           | 1 372                 |

## Solid tumors

### Bile duct

| Gene           | T-statistics | P-value  | Function                                                            | Domain                               | Expression                  | PubMed entries |
|----------------|--------------|----------|---------------------------------------------------------------------|--------------------------------------|-----------------------------|----------------|
| <i>DOCK5</i>   | -6,74        | 2,64E-11 | Guanine nucleotide exchange factors for small Rho family G proteins | SH3, C2 DOCK-type, DOCKER            | Med all 2.83<br>Med CS 3.43 | 62             |
| <i>EGFR</i>    | -6,64        | 5,15E-11 | Transmembrane glycoprotein, receptor for EGF family members.        | FU, tyrosine kinase catalytic domain | Med all 3.49<br>Med CS 5.34 | 106<br>644     |
| <i>TRPM7</i>   | -5,45        | 6,23E-08 | Ion channel and serine/threonine protein kinase                     | Alpha-type protein kinase            | Med all 3.89<br>Med CS 3.77 | 823            |
| <i>ARHGEF7</i> | -5,33        | 1,20E-07 | Ras-like family of Rho proteins                                     | CH,SH3, RhoGEF, PH                   | Med all 4.45<br>Med CS 3.95 | 126            |
| <i>ABCF1</i>   | -5,13        | 3.45E-07 | Member of the superfamily of ATP-binding cassette transporters.     | ABC transporter                      | Med all 5.58<br>Med CS 5.1  | 53             |

### Bone - Ewing sarcoma

| Gene         | T-statistics | P-value  | Function                                                    | Domain                               | Expression                  | PubMed entries |
|--------------|--------------|----------|-------------------------------------------------------------|--------------------------------------|-----------------------------|----------------|
| <i>TRIM8</i> | -23.2        | 5.34E-96 | E3 ubiquitin-protein ligase                                 | RING                                 | Med all 4,82<br>Med CS 3,87 | 67             |
| <i>FLI1</i>  | -19          | 1.92E-69 | Transcription factor, part of the EWS-FLI1 chimeric protein | SAM PNT-type, ETS DNA binding domain | Med all 1,63<br>Med CS 4,72 | 2 004          |

|                |       |          |                                                                                                                  |                                                                    |                                    |       |
|----------------|-------|----------|------------------------------------------------------------------------------------------------------------------|--------------------------------------------------------------------|------------------------------------|-------|
|                |       |          | characteristic for Ewing sarcoma                                                                                 | (variation of the HLH domain)                                      |                                    |       |
| <i>ETV6</i>    | -14.1 | 2.39E-41 | Transcription factor involved in chromosomal rearrangements associated with leukemia and congenital fibrosarcoma | SAM PNT-type, ETS DNA-binding domain (variation of the HLH domain) | Med all 2.73<br>Med CS 2.04        | 1 527 |
| <i>IGF2BP1</i> | -12.3 | 1.7E-32  | RNA binding, regulation of translation                                                                           | 2 RRM domain, 4 KH domain                                          | Med all 1.78<br>Med CS <b>5.92</b> | 391   |
| <i>STAG1</i>   | -10.6 | 6.29E-25 | Component of cohesin complex                                                                                     | SCD                                                                | Med all 3.64<br>Med CS 4.08        | 83    |

#### Bone - osteosarcoma

| Gene           | T-statistics | P-value  | Function                                      | Domain                                                     | Expression                  | PubMed entries |
|----------------|--------------|----------|-----------------------------------------------|------------------------------------------------------------|-----------------------------|----------------|
| <i>SMARCA1</i> | -5.51        | 4.5E-08  | Stabilization of damaged replication forks    | DEAD-like helicase, helicase superfamily c-terminal domain | Med all 3.64<br>Med CS 3.78 | 162            |
| <i>IRS1</i>    | -5.16        | 2.95E-07 | Insulin regulated processes by insulin        | PH, Phosphotyrosine-binding IRS domain                     | Med all 2.52<br>Med CS 3.17 | 6 093          |
| <i>SUB1</i>    | -5.16        | 2.99E-07 | General coactivator of transcription          | PC4 transcriptional coactivator domain                     | Med all 7.43<br>Med CS 7.62 | 414            |
| <i>HMG2</i>    | -5.11        | 3.82E-07 | Transcription factor                          | AT-hook HMG box DNA-binding domain                         | Med all 3.41<br>Med CS 2.58 | 1 607          |
| <i>FANCM</i>   | -5.06        | 4.85E-07 | DNA dependent ATPase component of the Fanconi | DEAD-like helicase, helicase superfamily c-terminal domain | Med all 2.45<br>Med CS 2.7  | 273            |

|  |  |  |                        |  |  |  |
|--|--|--|------------------------|--|--|--|
|  |  |  | anemia core<br>complex |  |  |  |
|--|--|--|------------------------|--|--|--|

## Breast

| Gene         | T-statistics | P-value  | Function             | Domain                                                                        | Expression                         | PubMed entries |
|--------------|--------------|----------|----------------------|-------------------------------------------------------------------------------|------------------------------------|----------------|
| <i>SPDEF</i> | -17.5        | 3.6E-60  | Transcription factor | SAM PNT-type, ETS DNA-binding domain (variation of the HLH domain)            | Med all 0.73<br>Med CS <b>5.97</b> | 219            |
| <i>FOXA1</i> | -14.4        | 5.14E-43 | Transcription factor | FORKHEAD DNA-binding domain                                                   | Med all 1.88<br>Med CS <b>5.03</b> | 1 330          |
| <i>TRPS1</i> | -14.4        | 5.54E-43 | Transcription factor | 9 non-tandem C2H2 type zinc fingers, zinc finger_GATA type DNA-binding domain | Med all 1.83<br>Med CS <b>4.78</b> | 269            |
| <i>ESR1</i>  | -11.5        | 5.33E-29 | Transcription factor | Ligand binding domain, DNA binding zinc finger_C4 domain                      | Med all 0.41<br>Med CS <b>1.22</b> | 5 797          |
| <i>GATA3</i> | -8.78        | 6.52E-18 | Transcription factor | two DNA binding GATA-type zinc fingers                                        | Med all 1.72<br>Med CS <b>4.91</b> | 4 524          |

## Glioma

| Gene           | T-statistics | P-value  | Function                                             | Domain     | Expression                  | PubMed entries |
|----------------|--------------|----------|------------------------------------------------------|------------|-----------------------------|----------------|
| <i>PRKARIA</i> | -11.6        | 2.21E-29 | Regulatory subunit of cAMP-dependent protein kinases | RiIa, cNMP | Med all 6,56<br>Med CS 6,97 | 692            |
| <i>JUN</i>     | -10          | 1.22E-22 | Transcription factor                                 | bZIP       | Med all 4,99<br>Med CS 6,77 | 3 725          |



|               |       |          |                                                  |                                  |                             |       |
|---------------|-------|----------|--------------------------------------------------|----------------------------------|-----------------------------|-------|
| <i>RPP25L</i> | -10   | 1.24E-22 | May be a component of ribonuclease P             | Alba-like DNA/RNA-binding domain | Med all 4,67<br>Med CS 4,42 | 0     |
| <i>LMNA</i>   | -9.7  | 2.48E-21 | Component of the nuclear lamina                  | IF                               | Med all 8,5<br>Med CS 8,84  | 1 839 |
| <i>VRK1</i>   | -9.25 | 1.24E-19 | Serine/threonine kinase in cell cycle regulation | Protein kinase domain            | Med all 5,1<br>Med CS 4,77  | 164   |

### Cervix

| Gene           | T-statistics | P-value  | Function                               | Domain                                   | Expression                  | Pub Med entries |
|----------------|--------------|----------|----------------------------------------|------------------------------------------|-----------------------------|-----------------|
| <i>ZER1</i>    | -15.7        | 8.98E-50 | Subunit of E3 ubiquitin ligase complex | -                                        | Med all 3,76<br>Med CS 3,53 | 9*              |
| <i>UBE3A</i>   | -13.2        | 8.08E-37 | E3 ubiquitin ligase                    | HECT                                     | Med all 4,88<br>Med CS 4,88 | 888             |
| <i>SPTY2D1</i> | -6.25        | 6.1E-10  | Histone chaperone                      | SPT2                                     | Med all 3.43<br>Med CS 3.34 | 7               |
| <i>CRTC2</i>   | -6.15        | 1.08E-09 | Transcriptional coactivator for CREB1  | TORC N,M and C                           | Med all 4.68<br>Med CS 4.27 | 441             |
| <i>NFIA</i>    | -5.7         | 1.56E-08 | Transcription factor                   | CTF /nuclear factor 1 DNA binding domain | Med all 1.87<br>Med CS 2.72 | 276             |

\*(62 for CRL2 synonym)

## Colorectal

| <b>Gene</b>   | <b>T-statistics</b> | <b>P-value</b> | <b>Function</b>                         | <b>Domain</b>                                   | <b>Expression</b>                  | <b>PubMed entries</b> |
|---------------|---------------------|----------------|-----------------------------------------|-------------------------------------------------|------------------------------------|-----------------------|
| <i>CTNNB1</i> | -20.7               | 4.25E-80       | Key downstream component of Wnt pathway | 12 ARM domain                                   | Med all 6,84<br>Med CS 7,1         | 9 797                 |
| <i>TCF7L2</i> | -18.4               | 2.16E-65       | Transcription factor                    | HMG box DNA binding domain                      | Med all 3,14<br>Med CS 4,11        | 1 779                 |
| <i>CDX2</i>   | -15.2               | 3.71E-47       | Transcription factor                    | Homeodomain                                     | Med all 0,72<br>Med CS <b>5,56</b> | 2 934                 |
| <i>KLF5</i>   | -11.9               | 6.95E-31       | Transcription factor                    | 3 tandemly placed C2H2-type zinc fingers        | Med all 3,53<br>Med CS 6,41        | 723                   |
| <i>SATB2</i>  | -10.6               | 4.75E-25       | Transcription factor                    | Two CUTs and one homeodomain DNA binding domain | Med all 2,01<br>Med CS 2,91        | 579                   |

## Esophagus

| <b>Gene</b>    | <b>T-statistics</b> | <b>P-value</b> | <b>Function</b>                                                                              | <b>Domain</b> | <b>Expression</b>           | <b>PubMed entries</b> |
|----------------|---------------------|----------------|----------------------------------------------------------------------------------------------|---------------|-----------------------------|-----------------------|
| <i>FIS1</i>    | -6.18               | 9.31E-10       | Control of mitochondrial morphology; cytochrome c release                                    | Fis1          | Med all 6.72<br>Med CS 6.52 | 638                   |
| <i>TIMM17A</i> | -5.98               | 3.03E-09       | Translocation of transit peptide-containing proteins across the mitochondrial inner membrane | -             | Med all 6.2<br>Med CS 6.13  | 15                    |

|                |       |          |                                                        |             |                             |       |
|----------------|-------|----------|--------------------------------------------------------|-------------|-----------------------------|-------|
| <i>TRMT10A</i> | -5.98 | 3.09E-09 | tRNA methyltransferase                                 | TRM10-type  | Med all 6.19<br>Med CS 6.13 | 13    |
| <i>ADAR</i>    | -5.95 | 3.62E-09 | RNA specific adenosine deaminase                       | DSRM, ADEAM | Med all 6,1<br>Med CS 6,16  | 1 653 |
| <i>ERBB3</i>   | -5.7  | 1.56E-08 | Member of the EGFR family of receptor tyrosine kinases | FU, TyrKc   | Med all 3,01<br>Med CS 5,12 | 2 509 |

### Stomach

| Gene           | T-statistics | P-value  | Function                                                                    | Domain                               | Expression                         | PubMed entries |
|----------------|--------------|----------|-----------------------------------------------------------------------------|--------------------------------------|------------------------------------|----------------|
| <i>FAM126B</i> | -7.19        | 1.22E-12 | Localization of phosphatidylinositol 4-kinase (PI4K) to the plasma membrane | -                                    | Med all 2.23<br>Med CS 2.26        | 4              |
| <i>TCF7L2</i>  | -6.76        | 2.35E-11 | Transcription factor                                                        | HMG box DNA-binding domain           | Med all 3.14<br>Med CS 4.43        | 1 779          |
| <i>CTNNB1</i>  | -5.97        | 3.33E-09 | Key downstream component of the canonical Wnt signaling pathway             | 12 ARM domain                        | Med all 6.84<br>Med CS 7.25        | 9 797          |
| <i>RAB10</i>   | -5.77        | 1.06E-08 | Member of the RAS superfamily of small GTPases.                             | Ras                                  | Med all 6,19<br>Med CS 6,4         | 271            |
| <i>GATA4</i>   | -5.46        | 6.12E-08 | Transcription factor                                                        | 2 DNA-binding GATA-type zinc fingers | Med all 0,94<br>Med CS <b>2,91</b> | 3 002          |

## Kidney

| Gene           | T-statistics | P-value  | Function                                                                | Domain                           | Expression                         | PubMed entries |
|----------------|--------------|----------|-------------------------------------------------------------------------|----------------------------------|------------------------------------|----------------|
| <i>PAX8</i>    | -14.8        | 2.41E-45 | Transcription factor                                                    | PAX DNA-binding domain           | Med all 1,86<br>Med CS <b>6,36</b> | 1 833          |
| <i>HNF1B</i>   | -13.9        | 1.52E-40 | Transcription factor                                                    | Homeodomain                      | Med all 0,89<br>Med CS <b>5,5</b>  | 1 205          |
| <i>SEC23IP</i> | -10          | 1.56E-22 | Organization of endoplasmic reticulum exit sites.                       | SAM, DDHD                        | Med all 4,04<br>Med CS 4,12        | 23             |
| <i>EPAS1</i>   | -9.59        | 6.48E-21 | Transcription factor                                                    | PAS, PAC; HLH DNA-binding domain | Med all 3,95<br>Med CS 4,74        | 465            |
| <i>PARD3</i>   | -9           | 1.03E-18 | Adapter protein involved in asymmetrical cell division and polarization | 3 PDZ domain                     | Med all 4,26<br>Med CS 5,78        | 343            |

## Liver

| Gene          | T-statistics | P-value  | Function                                                       | Domain                                 | Expression                         | PubMed entries |
|---------------|--------------|----------|----------------------------------------------------------------|----------------------------------------|------------------------------------|----------------|
| <i>HS2ST1</i> | -5.84        | 7.01E-09 | Heparan sulfate biosynthesis                                   | -                                      | Med all 3,93<br>Med CS 4,35        | 19             |
| <i>FGFR1</i>  | -5.61        | 2.53E-08 | Receptor tyrosine kinase for fibroblast growth factors         | Immunoglobulin C-2 Type, TyrKc         | Med all 3,9<br>Med CS 5,12         | 4 732          |
| <i>HNF4A</i>  | -5.58        | 3.08E-08 | Transcription factor                                           | HOLI, DNA-binding C4-type zinc fingers | Med all 0,6<br>Med CS <b>1,99</b>  | 1 583          |
| <i>KLB</i>    | -5.39        | 8.85E-08 | Binding of fibroblast growth factor 21 to the cognate receptor | -                                      | Med all 0,14<br>Med CS <b>0,69</b> | 413            |

|              |      |          |                                                                                                                            |                                                         |                             |     |
|--------------|------|----------|----------------------------------------------------------------------------------------------------------------------------|---------------------------------------------------------|-----------------------------|-----|
| <i>NDST1</i> | -5.3 | 1.39E-07 | Catalyzes both the N-deacetylation and the N-sulfation of glucosamine (GlcNAc) of the glycosaminoglycan in heparan sulfate | Heparan sulphate-N-deacetylase, sulfotransferase domain | Med all 4,32<br>Med CS 5,07 | 127 |
|--------------|------|----------|----------------------------------------------------------------------------------------------------------------------------|---------------------------------------------------------|-----------------------------|-----|

## Lung

| Gene                | T-statistics | P-value  | Function                                                            | Domain                                    | Expression                  | PubMed entries |
|---------------------|--------------|----------|---------------------------------------------------------------------|-------------------------------------------|-----------------------------|----------------|
| <i>NKX2-1</i>       | -8.61        | 2.75E-17 | Transcription factor                                                | Homeodomain                               | Med all 0,65<br>Med CS 1,17 | 834            |
| <i>NFE2L2(NRF2)</i> | -7.86        | 9.66E-15 | Transcription factor                                                | bZIP                                      | Med all 5,82<br>Med CS 6,04 | 8 359          |
| <i>SMARCA2</i>      | -7.1         | 2.38E-12 | Component of SWI/SNF-chromatin remodeling complex                   | QLQ, HAS, BRK, DEXDc, HELICc, SnAC, BROMO | Med all 4,59<br>Med CS 4,45 | 551            |
| <i>DDX5</i>         | -5.94        | 3.97E-09 | ATP-dependent RNA helicase (RNA stability/splicing)                 | DEXDc, HELICc                             | Med all 8,38<br>Med CS 8,44 | 350            |
| <i>NRDC</i>         | -5.83        | 7.62E-09 | Peptide cleavage at the N-terminus of Arg residues in dibasic pairs | Peptidase M16                             | Med all 6,35<br>Med CS 6,64 | 97             |

## Ovary

| Gene         | T-statistics | P-value  | Function                                                                | Domain                                      | Expression                         | PubMed entries |
|--------------|--------------|----------|-------------------------------------------------------------------------|---------------------------------------------|------------------------------------|----------------|
| <i>PAX8</i>  | -13.6        | 6.13E-39 | Transcription factor                                                    | PAX DNA-binding domain                      | Med all 1.86<br>Med CS <b>6.4</b>  | 1 833          |
| <i>PARD3</i> | -9.31        | 7.39E-20 | Adapter protein involved in asymmetrical cell division and polarization | Three PDZ domain                            | Med all 4.26<br>Med CS 5.05        | 343            |
| <i>SOX17</i> | -9.16        | 2.83E-19 | Transcription factor                                                    | HMG box DNA binding domain                  | Med all <b>0.32</b><br>Med CS 3.68 | 869            |
| <i>WT1</i>   | -8.67        | 1.61E-17 | Transcription factor                                                    | Four tandemly placed C2H2-type zinc fingers | Med all 1.06<br>Med CS 1.16        | 6 581          |
| <i>CCNE1</i> | -8.4         | 1.44E-16 | G1/S transition control                                                 | CYCLIN, Cyclin_c                            | Med all 3.63<br>Med CS 4.39        | 877            |

## Pancreas

| Gene         | T-statistics | P-value  | Function                                                                         | Domain                    | Expression                  | PubMed entries |
|--------------|--------------|----------|----------------------------------------------------------------------------------|---------------------------|-----------------------------|----------------|
| <i>KRAS</i>  | -15          | 4.15E-46 | Member of the RAS superfamily of small GTPases, regulation of cell proliferation | Ras                       | Med all 4,03<br>Med CS 4,13 | 21 810         |
| <i>DOCK5</i> | -12.8        | 5.01E-35 | Guanine nucleotide exchange factor for Rho and Rac.                              | SH3, C2 DOCK-type, DOCKER | Med all 2,83<br>Med CS 3,87 | 63 (0)         |
| <i>ID1</i>   | -8.4         | 1.43E-16 | Transcriptional regulator devoid of DNA binding activity                         | HLH                       | Med all 5,75<br>Med CS 6,98 | 1 809          |
| <i>FZD5</i>  | -8.26        | 4.36E-16 | Receptor for Wnt proteins                                                        | FRI, Frizzled             | Med all 1,74<br>Med CS 2,17 | 208            |

|            |       |          |                                       |   |                             |     |
|------------|-------|----------|---------------------------------------|---|-----------------------------|-----|
|            |       |          |                                       |   |                             |     |
| <i>WLS</i> | -7.31 | 5.46E-13 | Sorting and secretion of Wnt proteins | - | Med all 4,47<br>Med CS 5,26 | 726 |

### Neuroblastoma

| <b>Gene</b>   | <b>T-statistics</b> | <b>P-value</b> | <b>Function</b>      | <b>Domain</b>                | <b>Expression</b>                  | <b>PubMed entries</b> |
|---------------|---------------------|----------------|----------------------|------------------------------|------------------------------------|-----------------------|
| <i>ISL1</i>   | -24.6               | 1.53E-105      | Transcription factor | 2 LIM domain and homeodomain | Med all 0.83<br>Med CS <b>4,85</b> | 970                   |
| <i>HAND2</i>  | -22                 | 1.84E-88       | Transcription factor | HLH DNA-binding domain       | Med all 0,7<br>Med CS <b>8.2</b>   | 548                   |
| <i>PHOX2B</i> | -16.8               | 2.17E-56       | Transcription factor | Homeodomain                  | Med all 0,17<br>Med CS <b>6,6</b>  | 659                   |
| <i>PHOX2A</i> | -16.3               | 2.32E-53       | Transcription factor | Homeodomain                  | Med all 0.22<br>Med CS <b>7.3</b>  | 199                   |
| <i>MYCN</i>   | -13.7               | 1.75E-39       | Transcription factor | HLH DNA binding domain       | Med all 0.87<br>Med CS <b>9,44</b> | 2 871                 |

### Skin (squamous cell carcinoma, Merkel cell carcinoma, melanoma)

| <b>Gene</b>  | <b>T-statistics</b> | <b>P-value</b> | <b>Function</b>                               | <b>Domain</b>              | <b>Expression</b>                  | <b>PubMed entries</b> |
|--------------|---------------------|----------------|-----------------------------------------------|----------------------------|------------------------------------|-----------------------|
| <i>SOX10</i> | -32.6               | 7.93E-161      | Transcription factor                          | HMG box DNA-binding domain | Med all 0.58<br>Med CS <b>7,59</b> | 1 884                 |
| <i>BRAF</i>  | -25.9               | 3.99E-114      | Protein kinase that phosphorylates MAP2K1 and | RBD, C1                    | Med all 3.1<br>Med CS 3.17         | 19 157                |

|              |       |          |                                                                                                     |                        |                                    |       |
|--------------|-------|----------|-----------------------------------------------------------------------------------------------------|------------------------|------------------------------------|-------|
|              |       |          | activates the MAP kinase signaling pathway                                                          |                        |                                    |       |
| <i>MITF</i>  | -21   | 5.56E-82 | Transcription factor                                                                                | HLH DNA-binding domain | Med all 2<br>Med CS <b>5.79</b>    | 2 923 |
| <i>DUSP4</i> | -18.9 | 2.04E-68 | Regulates mitogenic signal transduction by dephosphorylating Thr and Tyr residues on ERK1 and ERK2. | RHOD, DSPc             | Med all 3.05<br>Med CS <b>6.55</b> | 239   |
| <i>MAPK1</i> | -18.7 | 1.77E-67 | MAP protein kinase                                                                                  | S_TKc                  | Med all 5.05<br>Med CS 5.48        | 3 205 |

#### Soft tissues - liposarcoma

| Gene          | T-statistics | P-value  | Function                                                                                                   | Domain                                | Expression                         | PubMed entries |
|---------------|--------------|----------|------------------------------------------------------------------------------------------------------------|---------------------------------------|------------------------------------|----------------|
| <i>CPM</i>    | -14.6        | 3.49E-44 | Specific removal of C-terminal basic residues Arg or Lys from peptides                                     | Zinc_pept                             | Med all 1,86<br>Med CS <b>5,71</b> | 6 999          |
| <i>BEST3</i>  | -11.2        | 1.16E-27 | Ca <sup>2+</sup> -sensitive Cl channel formation                                                           | -                                     | Med all 0,67<br>Med CS <b>2,5</b>  | 34             |
| <i>SEC23A</i> | -9.31        | 7.77E-20 | Component of the coat protein complex II (COPII)                                                           | Gelsolin-like, ZincF Sec23/Sec24-type | Med all 5.07<br>Med CS 6.11        | 117            |
| <i>HMGA2</i>  | -9.16        | 2.77E-19 | Transcription factor                                                                                       | AT-hook HMG box DNA binding domain    | Med all 3.41<br>Med CS 5.62        | 1 613          |
| <i>CAPS2</i>  | -8.97        | 1.34E-18 | Calcium-binding protein involved in exocytosis of vesicles filled with neurotransmitters and neuropeptides | C2, PH, DUF1041                       | Med all 1.6<br>Med CS 1,45         | 760            |



### Soft tissues – rhabdomyosarcoma

| <b>Gene</b>   | <b>T-statistics</b> | <b>P-value</b> | <b>Function</b>                                    | <b>Domain</b>                                    | <b>Expression</b>                  | <b>PubMed entries</b> |
|---------------|---------------------|----------------|----------------------------------------------------|--------------------------------------------------|------------------------------------|-----------------------|
| <i>MYOD1</i>  | -29.7               | 3,00E-140      | Transcription factor                               | HLH DNA binding domain                           | Med all 0,11<br>Med CS <b>5,6</b>  | 1 479                 |
| <i>PAX3</i>   | -23                 | 4.82E-95       | Transcription factor                               | PAX DNA binding domain                           | Med all 0,59<br>Med CS <b>2,51</b> | 1 975                 |
| <i>MYOG</i>   | -16.1               | 2.11E-52       | Transcription factor                               | HLH DNA binding domain                           | Med all 0,11<br>Med CS <b>5,67</b> | 1 312                 |
| <i>ZBTB18</i> | -11.6               | 2.65E-29       | Transcription factor                               | BTB, Four tandemly placed C2H2-type zinc fingers | Med all 3,09<br>Med CS 3,85        | 52                    |
| <i>DLL1</i>   | -10.3               | 6.09E-24       | Transmembrane ligand protein of Notch1-3 receptors | DSL, 8 EGF-like domain                           | Med all 1,07<br>Med CS 2,04        | 606                   |

### Upper aerodigestive

| <b>Gene</b>  | <b>T-statistics</b> | <b>P-value</b> | <b>Function</b>                                              | <b>Domain</b>                        | <b>Expression</b> | <b>PubMed entries</b> |
|--------------|---------------------|----------------|--------------------------------------------------------------|--------------------------------------|-------------------|-----------------------|
| <i>TP63</i>  | -16.3               | 2.12E-53       | Transcription factor                                         | P53 DNA-binding domain, SAM domain   | No data           | 2 2020                |
| <i>EGFR</i>  | -10.2               | 2.31E-23       | Transmembrane glycoprotein, receptor for EGF family proteins | FU, tyrosine kinase catalytic domain | No data           | 106 644               |
| <i>ITGB1</i> | -9.7                | 2.26E-21       | Receptors for collagen (cell adhesion)                       | INB, EGF-like, Integrin              | No data           | 642                   |

|                 |       |          |                                                               |                                  |         |    |
|-----------------|-------|----------|---------------------------------------------------------------|----------------------------------|---------|----|
| <i>EDF1</i>     | -9.41 | 3.04E-20 | Transcriptional coactivator                                   | Helix-turn-helix XRE family-like | No data | 51 |
| <i>ATP6V0E1</i> | -9    | 1,00E-18 | Vacuolar ATPase (acidification of intracellular compartments) | -                                | No data | 6  |

### Urinary tract

| Gene          | T-statistics | P-value  | Function                                                          | Domain                     | Expression                  | PubMed entries |
|---------------|--------------|----------|-------------------------------------------------------------------|----------------------------|-----------------------------|----------------|
| <i>PPARG</i>  | -9.56        | 7.8E-21  | Member of the peroxisome proliferator-activated nuclear receptors | C4-type zinc finger, HOLI  | Med all 2,6<br>Med CS 0,8   | 2 253          |
| <i>SOX4</i>   | -7.37        | 3.38E-13 | Transcription factor                                              | HMG box DNA binding domain | Med all 4,04<br>Med CS 4,51 | 756            |
| <i>RXRA</i>   | -6.73        | 2.86E-11 | Transcription factor                                              | C4-type zinc finger, HOLI  | Med all 3.51<br>Med CS 3.35 | 330            |
| <i>TEAD3</i>  | -5.75        | -5.75    | Transcription factor                                              | TEA DNA-binding domain     | Med all 3.12<br>Med CS 3.5  | 56             |
| <i>SNAP29</i> | -5.54        | 3.86E-08 | Receptor of N-ethylmaleimide-sensitive factor-attachment protein  | t_SNARE                    | Med all 4.11<br>Med CS 4.01 | 141            |

## Uterus

| Gene         | T-statistics | P-value  | Function                                                                                      | Domain                                         | Expression                        | PubMed entries |
|--------------|--------------|----------|-----------------------------------------------------------------------------------------------|------------------------------------------------|-----------------------------------|----------------|
| <i>CCNE1</i> | -7.89        | 7.75E-15 | Control of the cell cycle at the G1/S transition.                                             | CYCLIN, Cyclin_c                               | Med all 3.63<br>Med CS 4.57       | 880            |
| <i>PAX8</i>  | -7.47        | 1.65E-13 | Transcription factor                                                                          | PAX DNA-binding domain                         | Med all 1,86<br>Med CS <b>6,6</b> | 1 839          |
| <i>WRN</i>   | -6.63        | 5.23E-11 | DNA helicase that involves in DNA repair, replication, transcription and telomere maintenance | 35EXOc, DEXDc, HELIC, RQC, HRDC                | Med all 3.15<br>Med CS 3.35       | 1 238          |
| <i>MECOM</i> | -5.63        | 2.3E-08  | Histone-lysine N-methyltransferase                                                            | SET, 10 C2H2-type zinc fingers placed tandemly | Med all 2.01<br>Med CS 2.39       | 561            |
| <i>WDR88</i> | -5.37        | 9.82E-08 | Unknown                                                                                       | PQQ, 6 WD40 repeats                            | Med all 0.2<br>Med CS 0.21        | 1              |
