# Supplementary material for: Analyses of Genes Critical to Tumor Survival Reveal Potential ‘Supertargets’: Focus on Transcription
Source: MDPI journal article supplement (doi:10.3390/cancers15113042), 2023-06-03
Supplement: s1 [file s1]

|                                                                                             |                            |
|---------------------------------------------------------------------------------------------|----------------------------|
| Analysis Type:                                                                              | PANTHER Overrepresentation |
| Annotation Version and Release Date:                                                        | PANTHER version 1          |
| Analyzed List:                                                                              | upload_1 (Homo sa          |
| Reference List:                                                                             | Homo sapiens (all g        |
| Test Type:                                                                                  | FISHER                     |
| Correction:                                                                                 | FDR                        |
| PANTHER GO-Slim Molecular Function                                                          | Homo sapiens - REF         |
| fibroblast growth factor binding (GO:0017134)                                               | 6                          |
| growth factor binding (GO:0019838)                                                          | 35                         |
| DNA-binding transcription activator activity, RNA polymerase II-specific (GO:0001228)       | 38                         |
| DNA-binding transcription activator activity (GO:0001216)                                   | 38                         |
| transcription factor binding (GO:0008134)                                                   | 63                         |
| protein tyrosine kinase activity (GO:0004713)                                               | 96                         |
| cis-regulatory region sequence-specific DNA binding (GO:0000987)                            | 810                        |
| RNA polymerase II cis-regulatory region sequence-specific DNA binding (GO:0000978)          | 798                        |
| RNA polymerase II transcription regulatory region sequence-specific DNA binding (GO:001059) | 1059                       |
| DNA-binding transcription factor activity, RNA polymerase II-specific (GO:0000981)          | 984                        |
| DNA-binding transcription factor activity (GO:0003700)                                      | 1054                       |
| transcription cis-regulatory region binding (GO:0000976)                                    | 1099                       |
| transcription regulatory region nucleic acid binding (GO:0001067)                           | 1099                       |
| <b>sequence-specific double-stranded DNA binding (GO:1990837)</b>                           | <b>1117</b>                |
| sequence-specific DNA binding (GO:0043565)                                                  | 1148                       |
| double-stranded DNA binding (GO:0003690)                                                    | 1164                       |
| transcription regulator activity (GO:0140110)                                               | 1265                       |
| DNA binding (GO:0003677)                                                                    | 1361                       |
| nucleic acid binding (GO:0003676)                                                           | 1974                       |
| heterocyclic compound binding (GO:1901363)                                                  | 2375                       |
| organic cyclic compound binding (GO:0097159)                                                | 2412                       |
| binding (GO:0005488)                                                                        | 5893                       |
| molecular_function (GO:0003674)                                                             | 9609                       |
| Unclassified (UNCLASSIFIED)                                                                 | 10980                      |

esentation Test (Released 20221013)  
 7.0 Released 2022-02-22  
 piens)  
 enes in database)

| upload_1 ( | upload_1 (FDR) |
|------------|------------|------------|------------|------------|----------------|
| 2          | .04        | +          | 54.47      | 1.00E-03   | 2.49E-02       |
| 4          | .21        | +          | 18.67      | 9.10E-05   | 2.62E-03       |
| 3          | .23        | +          | 12.90      | 1.98E-03   | 4.70E-02       |
| 3          | .23        | +          | 12.90      | 1.98E-03   | 4.50E-02       |
| 4          | .39        | +          | 10.37      | 7.44E-04   | 1.93E-02       |
| 5          | .59        | +          | 8.51       | 3.82E-04   | 1.04E-02       |
| 42         | 4.96       | +          | 8.47       | 4.45E-27   | 2.21E-25       |
| 41         | 4.88       | +          | 8.40       | 2.98E-26   | 1.35E-24       |
| 52         | 6.48       | +          | 8.02       | 5.26E-33   | 2.87E-30       |
| 48         | 6.02       | +          | 7.97       | 4.21E-30   | 2.55E-28       |
| 51         | 6.45       | +          | 7.91       | 5.19E-32   | 7.09E-30       |
| 52         | 6.73       | +          | 7.73       | 2.98E-32   | 8.13E-30       |
| 52         | 6.73       | +          | 7.73       | 2.98E-32   | 5.42E-30       |
| 52         | 6.84       | +          | 7.61       | 6.36E-32   | 6.94E-30       |
| 52         | 7.03       | +          | 7.40       | 2.28E-31   | 1.78E-29       |
| 52         | 7.12       | +          | 7.30       | 4.34E-31   | 2.96E-29       |
| 54         | 7.74       | +          | 6.98       | 1.78E-31   | 1.62E-29       |
| 54         | 8.33       | +          | 6.48       | 6.01E-30   | 3.28E-28       |
| 58         | 12.08      | +          | 4.80       | 7.72E-26   | 3.24E-24       |
| 62         | 14.53      | +          | 4.27       | 3.23E-25   | 1.26E-23       |
| 62         | 14.76      | +          | 4.20       | 7.33E-25   | 2.67E-23       |
| 84         | 36.06      | +          | 2.33       | 1.57E-18   | 5.34E-17       |
| 95         | 58.80      | +          | 1.62       | 7.04E-11   | 2.14E-09       |
| 31         | 67.20      | -          | .46        | 7.04E-11   | 2.26E-09       |
