# Supplementary material for: Analyses of Genes Critical to Tumor Survival Reveal Potential ‘Supertargets’: Focus on Transcription
Source: Cancers (Basel). 2023 Jun 3;15(11):3042. doi: 10.3390/cancers15113042 (PMC10252933; doi:10.3390/cancers15113042)
Supplement: Supplementary file 1 [file cancers-15-03042-s001.zip]

Archive with 4 entries (4 files):
- cancers-2405642-Supplementary File S1.  Supertargets tables.pdf
- cancers-2405642-Supplementary File S2. Supplementary Figures.pdf
- cancers-2405642-Supplementary File S3. GO analysis.pdf
- cancers-2405642-Supplementary File S4. DNA-binding domains of Supertargets.pdf
